# Supplementary material
Source: Springer Nature journal article supplement (https://www.springermedizin.de/resource/supplementary/12884_2013_862_MOESM1_ESM.pdf/9458380)
Supplement: MOESM1 [file 9458380]

Questionnaire 1 (Socio-demographic characteristics)

|      |                                                                                                                 |               |                                |
|------|-----------------------------------------------------------------------------------------------------------------|---------------|--------------------------------|
| Q1   | Participant's Address                                                                                           | 1             | Kericho West (Belgut) District |
|      |                                                                                                                 | 2             | Kericho (East) District        |
|      |                                                                                                                 | 3             | Others/specify ( )             |
| Q2   | Last baby's age                                                                                                 | ( ) months    |                                |
| Q3   | How old are you?                                                                                                | ( ) years old |                                |
| Q4   | Have you ever attended school?                                                                                  | Yes           | No                             |
| Q5   | If "Yes" in Q4, What is the highest level of education you attended: primary, vocational, secondary, or higher? | 1             | Less than Primary              |
|      |                                                                                                                 | 2             | Primary                        |
|      |                                                                                                                 | 3             | Post-Primary/Vocational        |
|      |                                                                                                                 | 4             | Secondary/'A' LEVEL            |
|      |                                                                                                                 | 5             | College (Middle Level)         |
|      |                                                                                                                 | 6             | University                     |
|      |                                                                                                                 | 7             | Others/Specify ( )             |
| Q6   | What is your main work?                                                                                         | 1             | Farmer for own consumption     |
|      |                                                                                                                 | 2             | Farmer for commercial products |
|      |                                                                                                                 | 3             | Government employee            |
|      |                                                                                                                 | 4             | Private employee               |
|      |                                                                                                                 | 5             | Self-employed                  |
|      |                                                                                                                 | 6             | School student                 |
|      |                                                                                                                 | 7             | Others/specify ( )             |
| Q7   | What is your ethnic group/tribe?                                                                                | 1             | Kipsigis                       |
|      |                                                                                                                 | 2             | Others/Specify ( )             |
| Q8   | Which of these assets are found in your household?                                                              |               |                                |
| Q8-1 | Clock or watch                                                                                                  | Yes           | No                             |
| Q8-2 | Electricity                                                                                                     | Yes           | No                             |
| Q8-3 | Radio                                                                                                           | Yes           | No                             |
| Q8-4 | Television                                                                                                      | Yes           | No                             |
| Q8-5 | Mobile telephone                                                                                                | Yes           | No                             |
| Q8-6 | Non-mobile telephone                                                                                            | Yes           | No                             |
| Q8-7 | Refrigerator                                                                                                    | Yes           | No                             |

|      |                                      |     |                                         |
|------|--------------------------------------|-----|-----------------------------------------|
| Q8-8 | Solar panel                          | Yes | No                                      |
| Q9   | Do you have any medical insurance?   | 1   | NHIF (National Hospital Insurance Fund) |
|      |                                      | 2   | Private Insurance                       |
|      |                                      | 3   | No, I don't have.                       |
| Q10  | What is your current marital status? | 1   | Married /Cohabiting                     |
|      |                                      | 2   | Divorced                                |
|      |                                      | 3   | Widowed                                 |
|      |                                      | 4   | Never married / Never lived together    |
|      |                                      | 5   | Others/Specify ( )                      |
